# Supplementary material
Source: publisher figshare collection journal article supplement (https://frontiersin.figshare.com/ndownloader/files/13112030)
Supplement: Supplementary file [file 13112030]

## *Supplementary Material*

# **Purinergic Profiling of Regulatory T-cells in Patients with Episodic Migraine**

**Dilyara Nurkhametova<sup>†1,2</sup>, Igor Kudryavtsev<sup>†3,4</sup>, Olga Khayrutdinova<sup>†5</sup>, Maria Serebryakova<sup>3</sup>, Rashid Altunbaev<sup>5</sup>, Tarja Malm<sup>1</sup>, and Rashid Giniatullin<sup>\*1,2</sup>**

### **\*Correspondence:**

Rashid Giniatullin, MD, PhD

Professor of Cell Biology

A.I. Virtanen Institute University of Eastern Finland

Neulaniementie 2, P.O. Box 1627, 70211 Kuopio, Finland

email: [Rashid.Giniatullin@uef.fi](mailto:Rashid.Giniatullin@uef.fi)

tel: +358403553665

Fax +35817163030

## **1 Supplementary Data**

Duration of migraine negatively correlated with the central memory Tregs subset expressing CD73+, including CD73+CD39- CM Tregs, (Suppl. Figure 1, A and B) but days after last migraine attack does not correlate with expression of different patterns of CD73 and CD39 in Tregs in patients with migraine according to Spearman rank correlation (Suppl. Figure 2).

## **2 Supplementary Figures and Tables**

### **2.1 Supplementary Figures**

## Suppl. fig.1

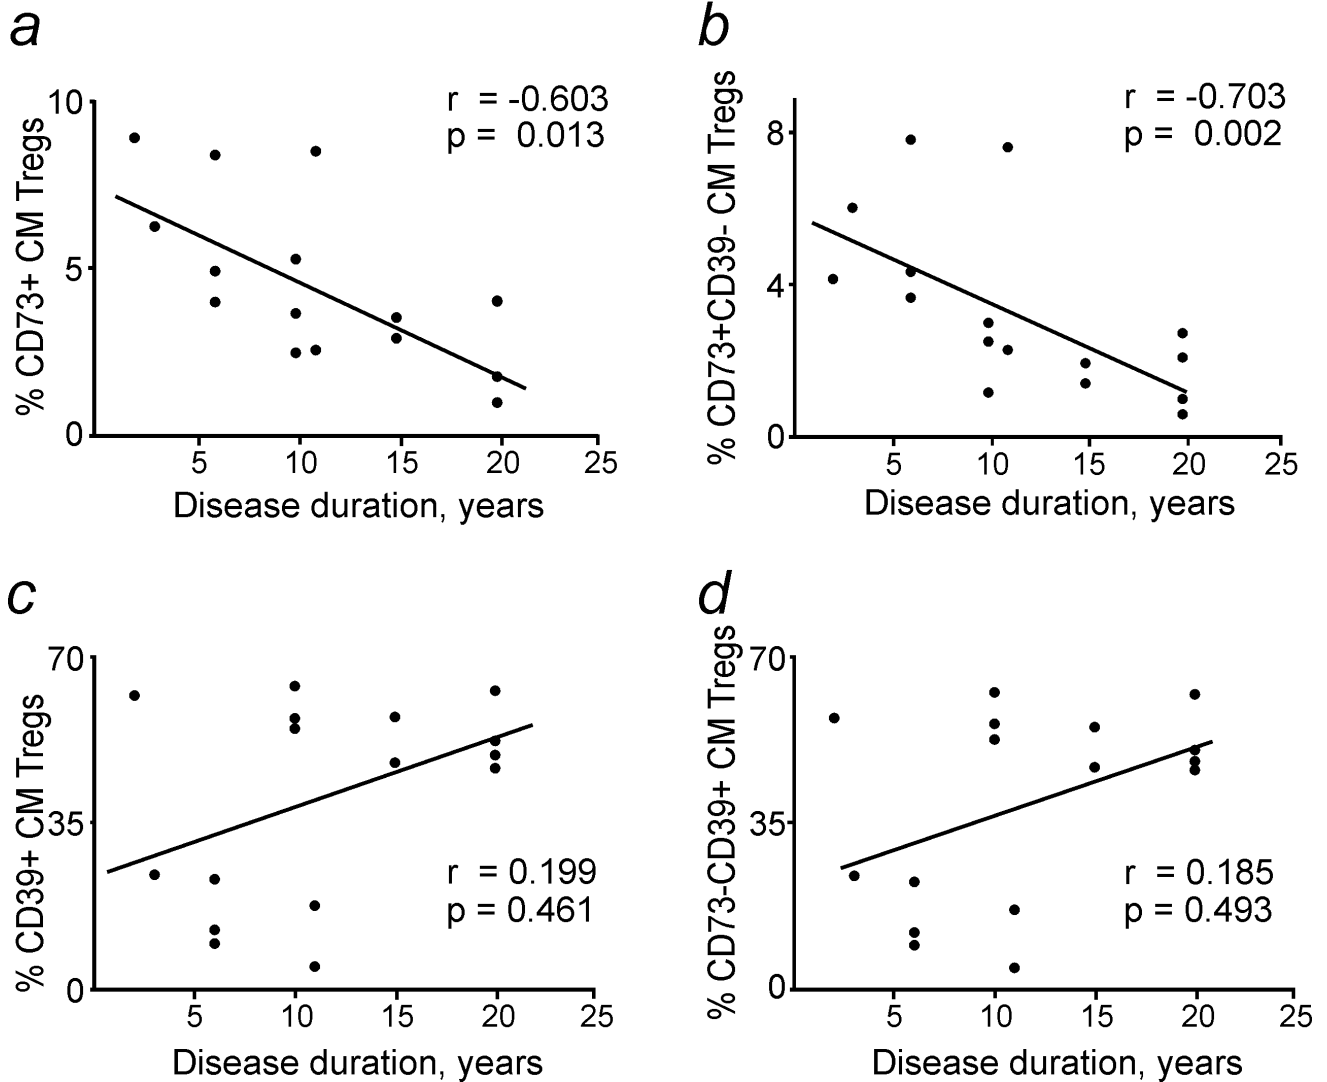

**Supplementary figure 1.** Correlations between disease duration and central memory Tregs expressing different patterns of CD73 and CD39 in patients with migraine according to Spearman rank correlation test.

Suppl. fig. 2

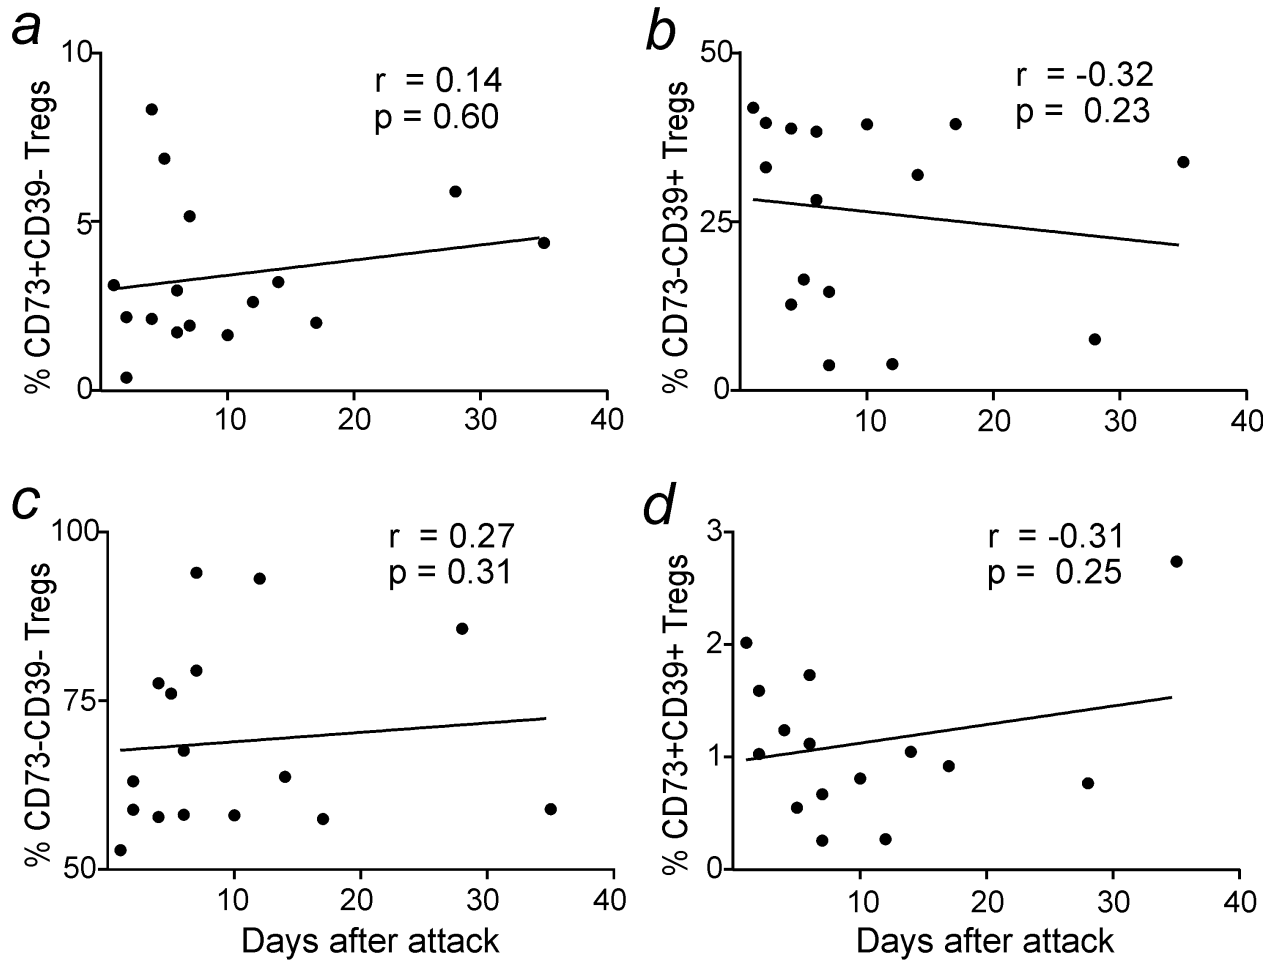

**Supplementary figure 2.** Correlations between days after last migraine attack and expression of different patterns of CD73 and CD39 in Tregs in patients with migraine according to Spearman rank correlation test.
